# Supplementary material for: An algorithm-assisted automated identification and enumeration system for sensitive hydrogen sulfide sensing under dark field microscopy
Source: Royal Society of Chemistry journal article supplement (doi:10.1039/d2an00149g), 2022-01-01
Supplement: d2an00149g1.pdf [file d2an00149g1.pdf]

**Supporting information for**  
**Algorithm-assisted automated identification and enumeration**  
**system for sensitive hydrogen sulfide sensing under dark field**  
**microscopy**

Shaohua Xu,<sup>a, b</sup> Xiaoyu Deng,<sup>c</sup> Shuyi Ji,<sup>d</sup> Lifen Chen,<sup>\*b</sup> Tiesong Zhao,<sup>d</sup> Fang Luo,<sup>e</sup> Bin Qiu,<sup>e</sup> Zhenyu Lin,<sup>e</sup> and Longhua Guo<sup>\*b, e</sup>

- a. Integrated Chinese and Western Medicine Cancer Research Center, Jiangxi University of Chinese Medicine, Nanchang, Jiangxi, 330004, China
- b. College of Biological, Chemical Sciences and Engineering, Jiaying University, Jiaying, Zhejiang 314001, China.
- c. Ministry of Education Key Laboratory of Modern Preparation of Traditional Chinese Medicine, Jiangxi University of Chinese Medicine, Nanchang, Jiangxi, 330004, China
- d. Fujian Key Lab for Intelligent Processing and Wireless Transmission of Media Information, College of Physics and Information Engineering, Fuzhou University, Fuzhou, Fujian 350116, China
- e. Ministry of Education Key Laboratory for Analytical Science of Food Safety and Biology, Fujian Provincial Key Laboratory of Analysis and Detection for Food Safety, College of Chemistry, Fuzhou University, Fuzhou, Fujian, 350116, China

\* Corresponding author

E-mail address: [lfchen@zjxu.edu.cn](mailto:lfchen@zjxu.edu.cn); [guolh@fzu.edu.cn](mailto:guolh@fzu.edu.cn).

## Table of content

|                                                                                                                 |    |
|-----------------------------------------------------------------------------------------------------------------|----|
| <b>Figure S1</b> Ten DFM images of AuNPs.                                                                       | S3 |
| <b>Table S1</b> The counting results of total nanoparticles and monomer particles by two methods.               | S3 |
| <b>Figure S2</b> UV-vis spectrum of AuNPs and AuNPs-Alk-N <sub>3</sub> , and corresponding colorimetric images. | S4 |
| <b>Figure S3</b> TEM images of AuNPs-Alk-N <sub>3</sub> in different circumstances.                             | S5 |
| <b>Figure S4</b> Optimization of the experimental conditions.                                                   | S6 |
| <b>Figure S5</b> TEM images of AuNPs-Alk-N <sub>3</sub> after reaction with 5.0 μM and 50 μM H <sub>2</sub> S.  | S7 |
| <b>Figure S6</b> Result of H <sub>2</sub> S detection by the methylene blue colorimetric method.                | S8 |
| <b>Table S2</b> Comparison of analytic performance of the different methods for H <sub>2</sub> S detection.     | S9 |

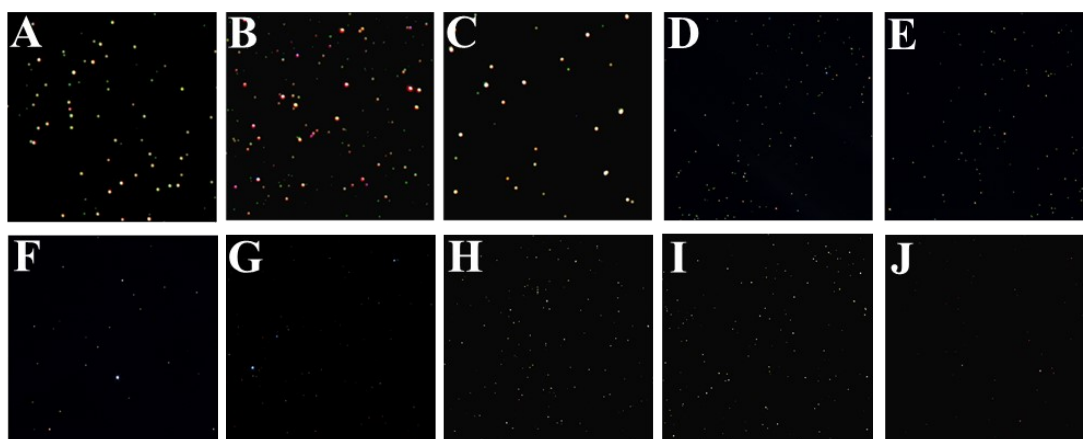

Figure S1 DFM images of AuNPs.

Table S1 The counting results of total particle number, green particle number and the ratio of green particle by two methods.

| Method | Color threshold <sup>1</sup> |       |           | Meanshift <sup>2</sup> |       |           |
|--------|------------------------------|-------|-----------|------------------------|-------|-----------|
|        | Total                        | Green | Ratio (%) | Total                  | Green | Ratio (%) |
| A      | 76                           | 42    | 55.26     | 76                     | 19    | 25.00     |
| B      | 155                          | 93    | 60.00     | 151                    | 75    | 49.67     |
| C      | 31                           | 6     | 19.35     | 31                     | 2     | 6.452     |
| D      | 119                          | 118   | 99.16     | 130                    | 51    | 39.23     |
| E      | 97                           | 99    | 102.1     | 122                    | 61    | 50.00     |
| F      | 31                           | 21    | 67.74     | 44                     | 10    | 22.73     |
| G      | 141                          | 44    | 32.21     | 181                    | 52    | 28.73     |
| H      | 167                          | 152   | 91.02     | 168                    | 94    | 55.95     |
| I      | 174                          | 165   | 94.83     | 173                    | 62    | 35.84     |
| J      | 66                           | 5     | 7.576     | 65                     | 10    | 15.38     |

1. Parameters for color threshold. For total scattering spot: Hue range was set 0 ~ 255, brightness range was set 10 ~ 255; and hue range was set 60 ~ 110, brightness range was set 10 ~ 150 for green spot. In counting part, the size (pixel<sup>2</sup>) was set 10. Other parameters were both default.

2. Parameters for mean shift algorithm. The color size was set as 7 and bandwidth was set as 10 for both images analyzing.

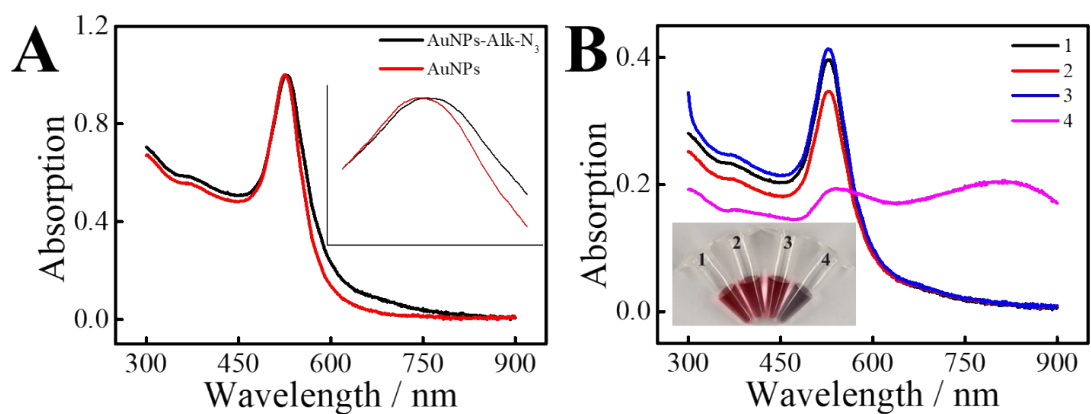

Figure S2 (A) Uv-Vis spectrum of bare AuNPs (red) and AuNPs-Alk-N<sub>3</sub> (black), inserted spectrum was Uv-Vis spectrum between 500 to 560 nm; (B) Uv-Vis spectrum of AuNPs-Alk-N<sub>3</sub> after mixed with (1) H<sub>2</sub>O, (2) 1 mM Cu<sup>2+</sup>, (3) 2 mM SA, and (4) 1 mM Cu<sup>2+</sup> and 2 mM SA; inserted picture was their corresponding digital photograph.

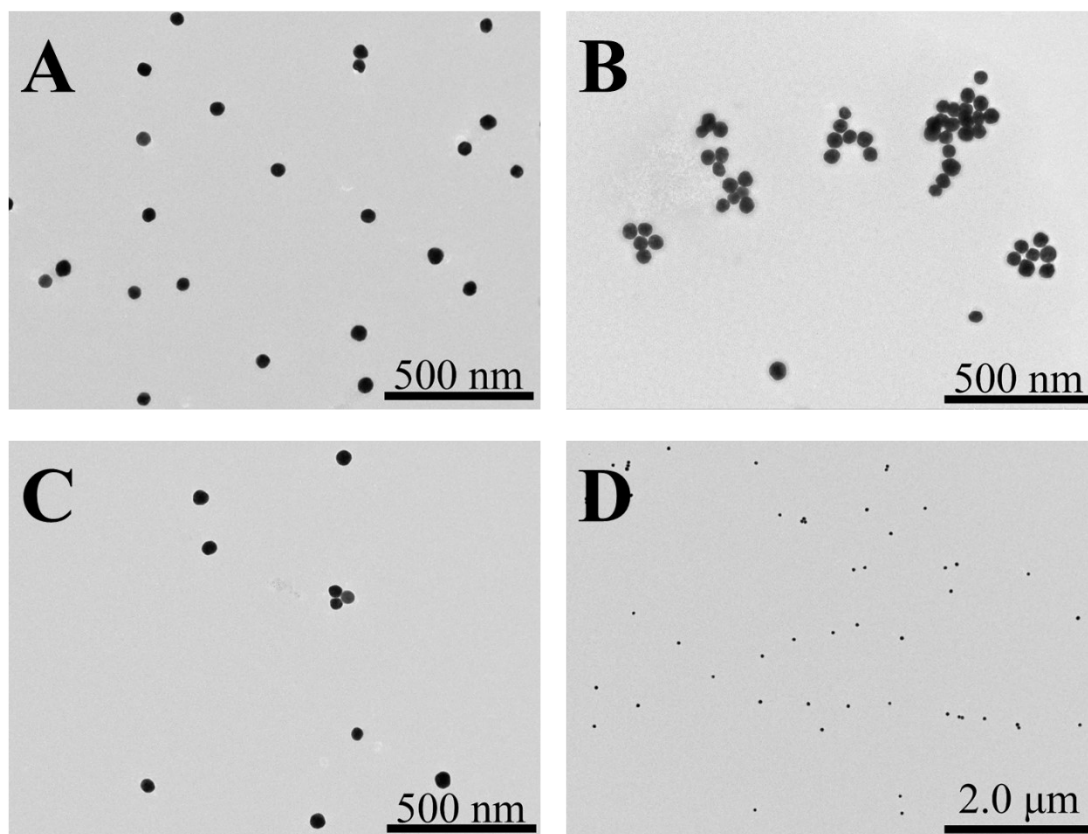

Figure S3 TEM images of (A) AuNPs-alk-N<sub>3</sub>; (B) AuNPs-alk-N<sub>3</sub> with no H<sub>2</sub>S treated after mixed with Cu<sup>2+</sup> and SA; (C) 80 μM H<sub>2</sub>S treated AuNPs-alk-N<sub>3</sub> after mixed with Cu<sup>2+</sup> and SA and (D) the corresponding large scale images.

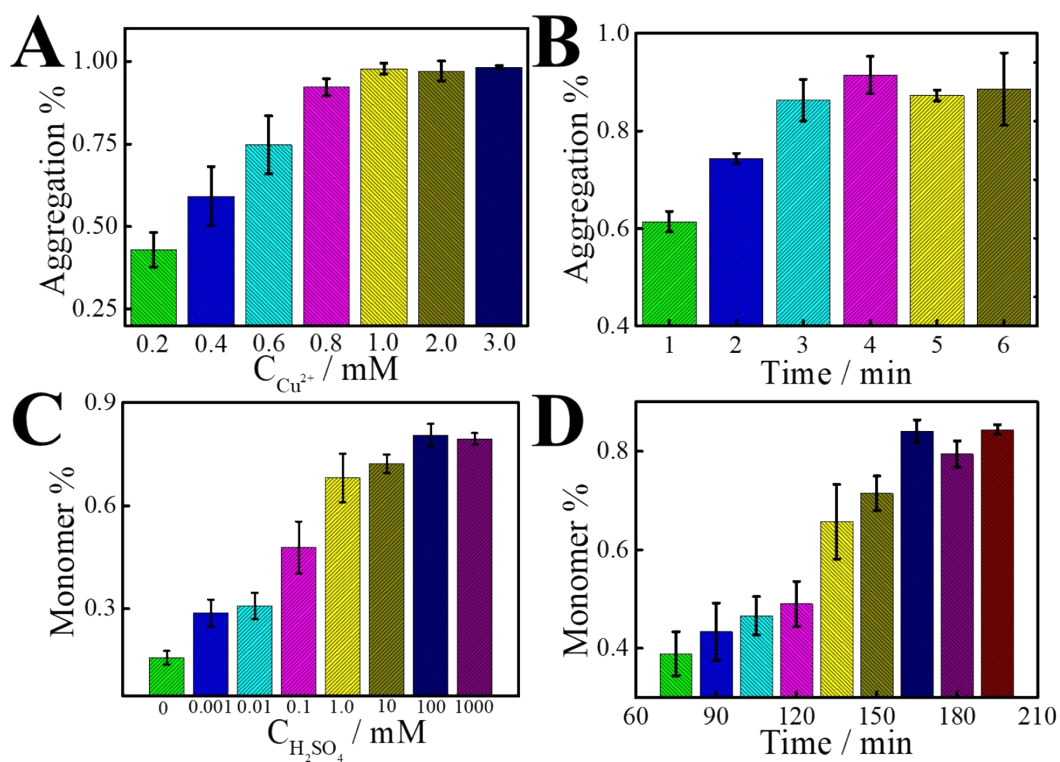

Figure S4 Optimization of experimental conditions. Effect of (A) the concentration of  $Cu^{2+}$  and (B) click chemical reaction time on the aggregation of gold nanoparticles; effect of (C)  $H_2SO_4$  concentration and (D) incubate time between  $H_2S$  and AuNPs- $N_3$ -Alk on the monomer ratio. The concentration  $S^{2-}$  is  $80.0 \mu M$ .

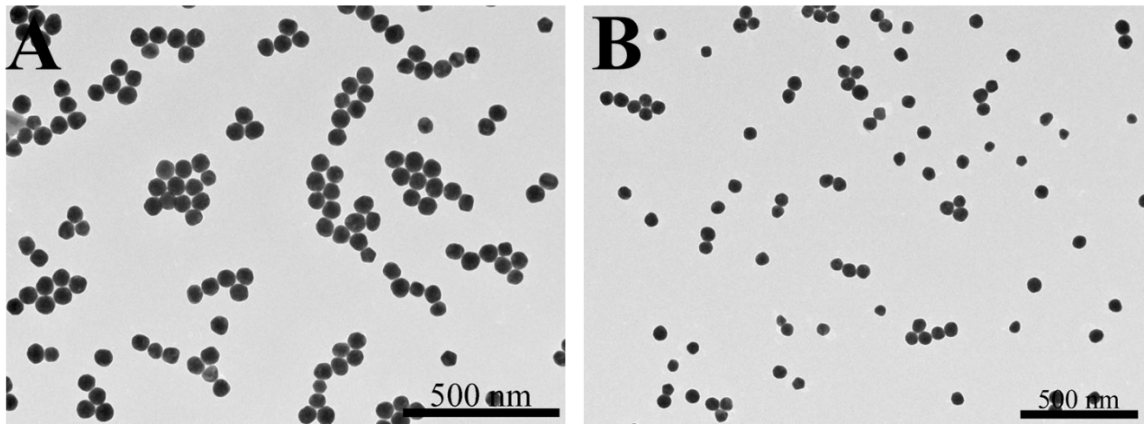

Figure S5 TEM images of AuNPs after treated with (A) 5.0  $\mu\text{M}$  and (B) 50  $\mu\text{M}$   $\text{H}_2\text{S}$ .

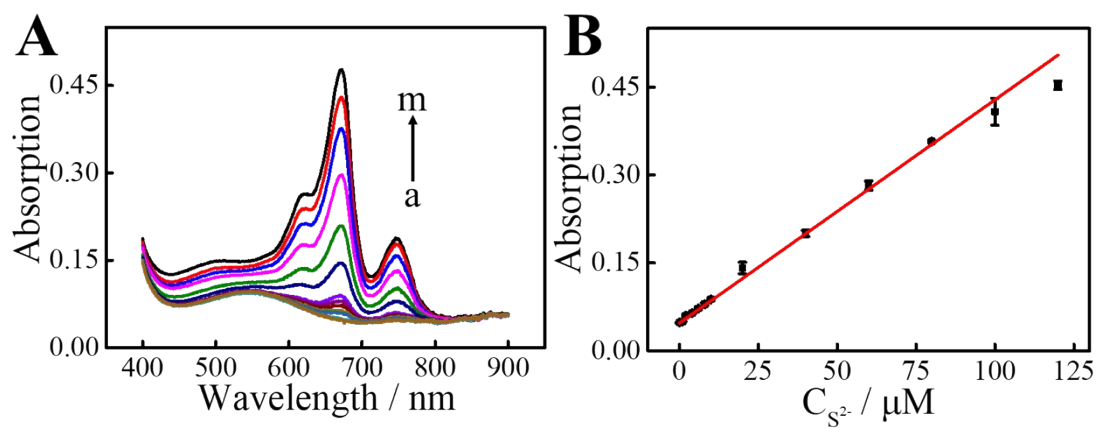

Figure S6 Result of H<sub>2</sub>S detection by methylene blue colorimetric method. (A) The UV-visible absorption spectrum of solution, and (B) corresponding linear relationship between H<sub>2</sub>S concentration and the absorption value at 665 nm. The concentration of H<sub>2</sub>S concentration from a to m were 0, 1, 2, 4, 6, 8, 10, 20, 40, 80, 100, and 120 μM.



Table S2 Comparison of analytic performance of the different methods for H<sub>2</sub>S detection.

| Detection Method         | Linear Range         | Detection Limit       | Ref.      |
|--------------------------|----------------------|-----------------------|-----------|
| Chemiluminescent         | 20 – 100 $\mu$ M     | 4.6 $\pm$ 2.0 $\mu$ M | S1        |
| Chemiluminescent         | 0.78 – 40 $\mu$ M    | 0.30 $\mu$ M          | S2        |
| Electrochemiluminescence | 0.05 – 100.0 $\mu$ M | 0.02 $\mu$ M          | S3        |
| Fluorescence             | 0 – 100 $\mu$ M      | 0.86 $\mu$ M          | S4        |
| Fluorescence             | 4.1 – 110 $\mu$ M    | 4.1 $\mu$ M           | S5        |
| Fluorescence             | 0.10 – 80 $\mu$ M    | 0.035 $\mu$ M         | S6        |
| Fluorescence             | 0.5 – 5 $\mu$ M      | 0.2 $\mu$ M           | S7        |
| Colorimetric             | 0.05 – 50 $\mu$ M    | 0.019 $\mu$ M         | S8        |
| Colorimetric             | 0.01 – 5 $\mu$ M     | 0.01 $\mu$ M          | S9        |
| Colorimetric             | 1 – 6 $\mu$ M        | 0.78 $\mu$ M          | S10       |
| DFM                      | 2 – 80 $\mu$ M       | 2 $\mu$ M             | This work |

## References

- S1. T. S. Bailey and M. D. Pluth, *J. Am. Chem. Soc.*, 2013, **135**, 16697-16704.
- S2. Z. Fang, G. Yue, J. Wang, F. Luo, L. Guo, B. Qiu and Z. Lin, *Anal. Methods*, 2019, **11**, 3085-3089.
- S3. J.-T. Cao, Y.-Z. Fu, X.-L. Fu, S.-W. Ren and Y.-M. Liu, *Analyst*, 2022, **147**, 247-251.
- S4. S. K. Patra, S. K. Sheet, B. Sen, K. Aguan, D. R. Roy and S. Khatua, *J. Org. Chem.*, 2017, **82**, 10234-10246.
- S5. C. Yan, D. Liu, L. An, Y. Wang, Q. Tian, J. Lin and S. Yang, *Anal. Chem.*, 2020, **92**, 8254-8261.
- S6. P. Ling, C. Qian, J. Yu and F. Gao, *Chem. Commun.*, 2019, **55**, 6385-6388.
- S7. X. Zhang, W. Zhou, Z. Yuan and C. Lu, *Analyst*, 2015, **140**, 7443-7450.
- S8. Z. Chen, C. Chen, H. Huang, F. Luo, L. Guo, L. Zhang, Z. Lin and G. Chen, *Anal. Chem.*, 2018, **90**, 6222-6228.
- S9. H. Fu and X. Duan, *RSC Adv.*, 2015, **5**, 3508-3511.
- S10. X. Xin, F. Dai, F. Li, X. Jin, R. Wang and D. Sun, *Anal. Methods*, 2017, **9**, 3094-3098.
